# Supplementary material for: Development and validation of a new method for the simultaneous determination of PAHs and NDL-PCBs in fish by GC-SQ-MS
Source: Royal Society of Chemistry journal article supplement (doi:10.1039/d3ay00305a), 2023-01-01
Supplement: d3ay00305a1.pdf [file d3ay00305a1.pdf]

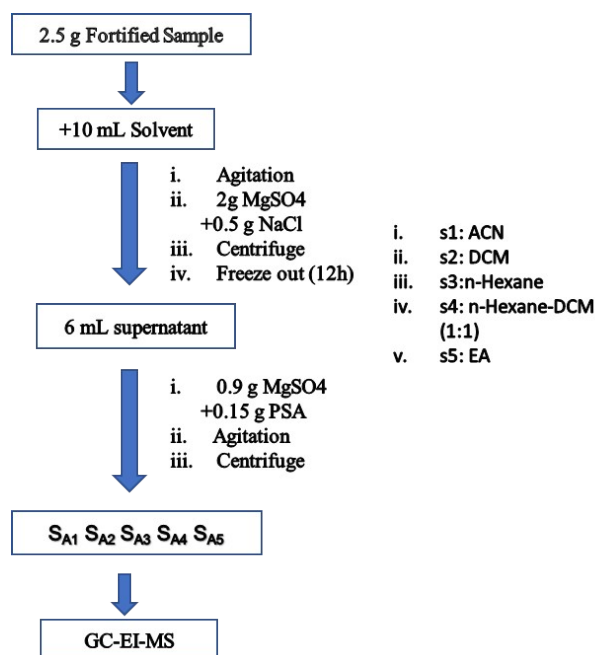

Fig. S1a: Abbreviated flow diagram for the selection of the extraction solvent (where ACN: Acetonitrile, DCM: Dichloromethane, EA: Ethyl Acetate, PSA: Primary Secondary Amine)

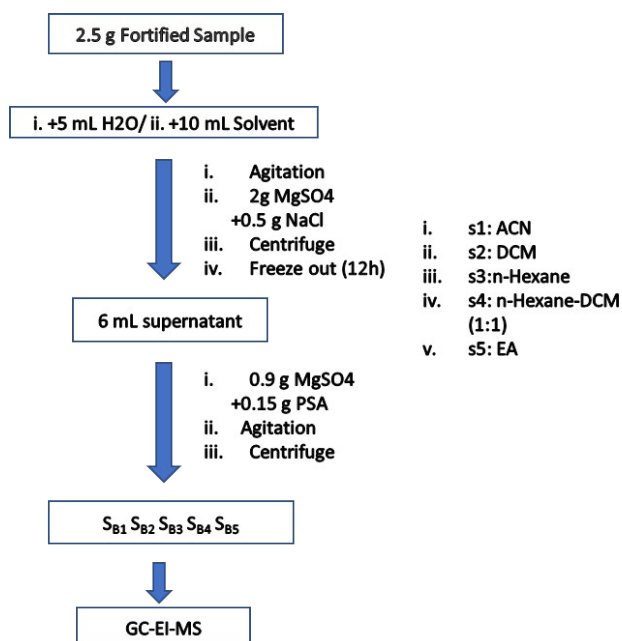

Fig. S1b: Abbreviated flow diagram for the selection of the extraction solvent (where ACN: Acetonitrile, DCM: Dichloromethane, EA: Ethyl Acetate, PSA: Primary Secondary Amine)

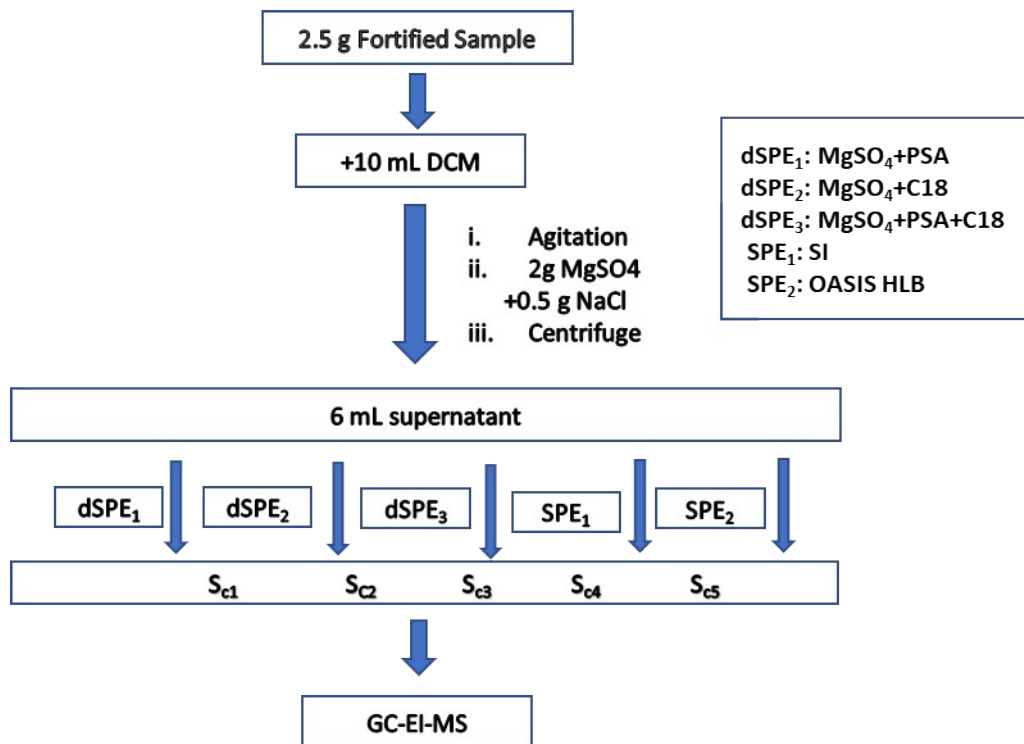

Fig. S2: Abbreviated flow diagram for the selection of sample purification (where PSA: Primary Secondary Amine, SI: Silica cartridge, dSPE: Dispersive Solid Phase Extraction, SPE: Solid Phase Extraction)

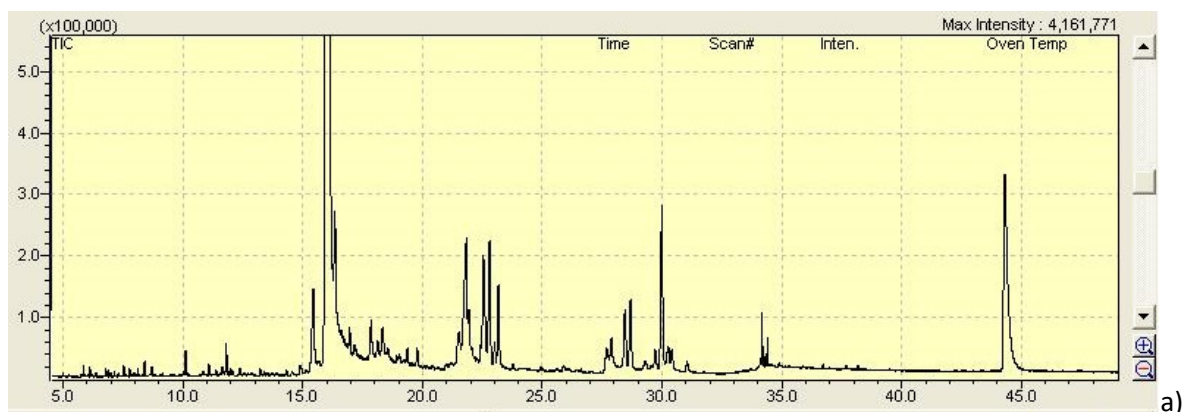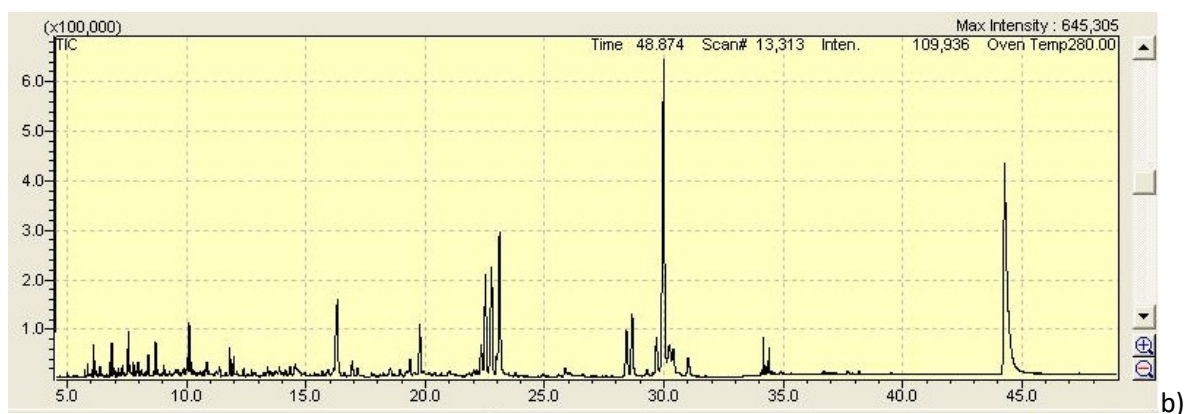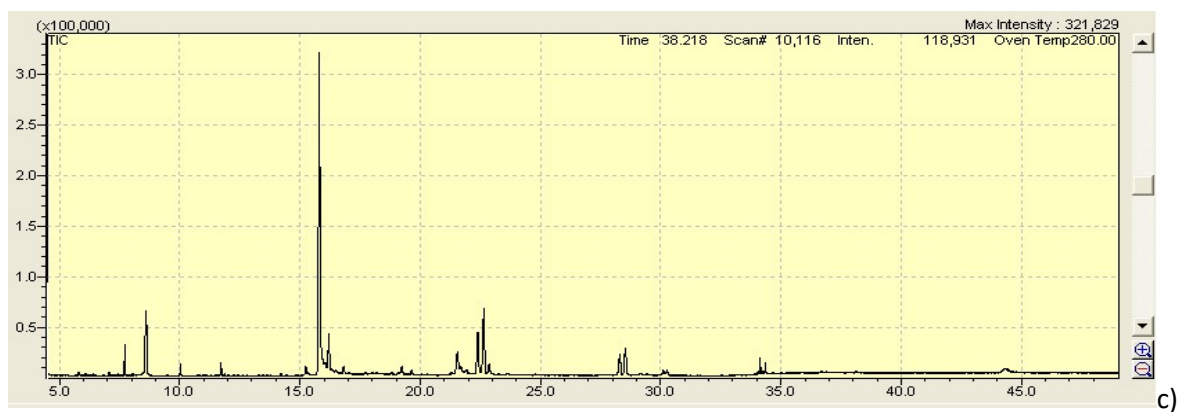

Fig. S3: TIC chromatogram of blank samples with 3 different purification procedure; a) dSPE (MgSO<sub>4</sub>+PSA), b) dSPE(MgSO<sub>4</sub>+PSA+C18 and c) SPE (Isolute SI cartridge)

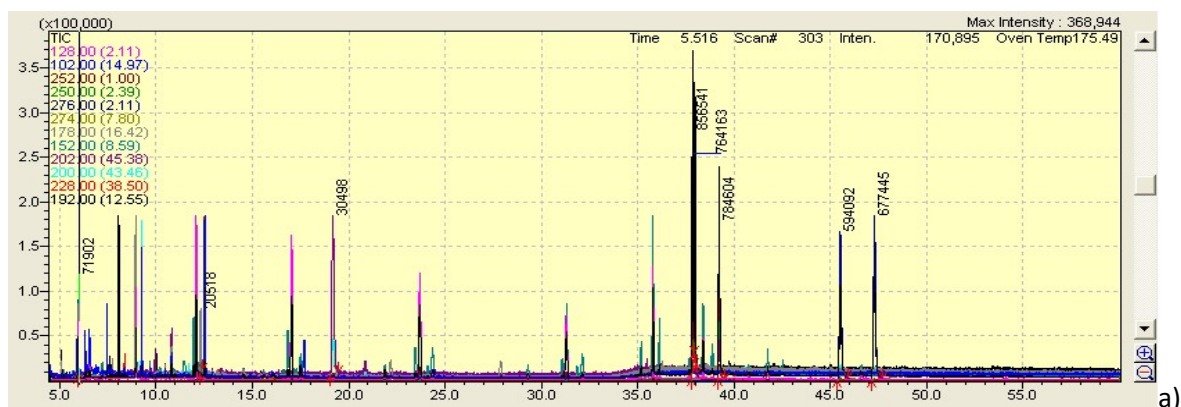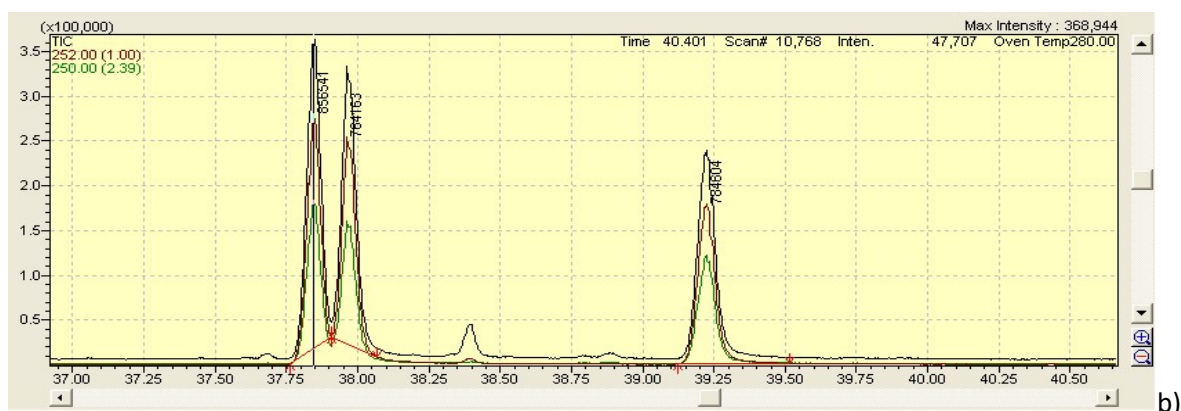

Fig. S4: a) TIC chromatogram of spiked swordfish sample with PAHs standard mixture at  $6.6 \mu\text{g kg}^{-1}$ . Peaks appear in the following order: NA, AN, FL, B[b]F, B[k]F, B[a]P, IP, B[ghi]P.  
 b) A zoom into peaks B[b]F, B[k]F, B[a]P monitoring with ions 252 and 250.

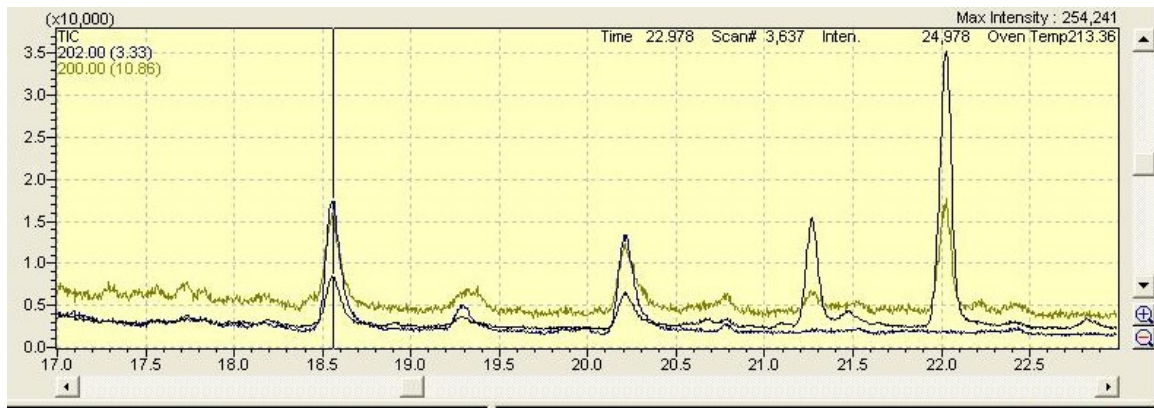

Fig S5: Chromatogram of smoked tuna fish (can). Peak at 18.6 min with ions 202 and 200 stands for FL (Fluoranthene).

Table S1: Regression data analysis at 95% confidence level

| Compound | a         | Sa        | b          | Sb        | S <sub>y/x</sub> | R <sup>2</sup> |
|----------|-----------|-----------|------------|-----------|------------------|----------------|
| PCB-1    | 1.197E+06 | 7.907E+04 | 2.980E+06  | 1.963E+06 | 2.927E+06        | 0.99           |
| PCB-11   | 0.68E+06  | 2.061E+04 | -8.380E+05 | 5.115E+06 | 7.627E+06        | 0.997          |
| PCB-28   | 2.668E+06 | 9.179E+04 | -4.588E+03 | 2.279E+06 | 3.397E+06        | 0.996          |
| PCB-52   | 0.73E+06  | 2.802E+04 | -4.235E+05 | 6.956E+06 | 1.037E+06        | 0.996          |
| PCB-47   | 6.860E+05 | 2.839E+04 | -4.709E+05 | 7.047E+05 | 1.051E+06        | 0.995          |
| PCB-117  | 7.910E+05 | 3.030E+04 | -1.605E+05 | 7.522E+06 | 1.122E+06        | 0.996          |
| PCB-101  | 6.219E+05 | 2.161E+04 | -3.280E+02 | 5.364E+06 | 7.998E+06        | 0.996          |
| PCB-136  | 3.593E+05 | 1.032E+04 | 1.679E+06  | 2.563E+06 | 3.821E+06        | 0.998          |
| PCB-118  | 8.326E+05 | 3.637E+04 | -5.571E+05 | 9.030E+06 | 1.346E+06        | 0.994          |
| PCB-153  | 6.196E+05 | 2.979E+04 | -3.271E+05 | 7.396E+06 | 1.103E+06        | 0.993          |
| PCB-185  | 2.417E+05 | 7.261E+06 | -1.395E+05 | 1.803E+06 | 2.688E+06        | 0.997          |
| PCB-180  | 4.076E+05 | 2.555E+04 | -1.664E+05 | 6.342E+06 | 9.456E+06        | 0.99           |
| PCB-209  | 4.818E+05 | 2.290E+04 | -1.050E+05 | 5.685E+06 | 8.476E+05        | 0.993          |
| NA       | 1.448E+06 | 4.312E+04 | 3.328E+06  | 2.273E+06 | 3.073E+06        | 0.997          |
| AN       | 3.936E+06 | 2.584E+05 | -1.707E+04 | 1.363E+04 | 1.842E+04        | 0.99           |
| FL       | 5.624E+06 | 3.375E+05 | -2.177E+04 | 1.780E+04 | 2.406E+04        | 0.99           |
| B[b]F    | 8.927E+06 | 6.701E+05 | -6.301E+04 | 3.533E+04 | 4.776E+04        | 0.98           |
| B[k]F    | 9.054E+06 | 6.577E+05 | -6.391E+04 | 3.468E+04 | 4.688E+04        | 0.98           |
| B[a]P    | 3.589E+06 | 2.613E+05 | -2.971E+04 | 1.378E+04 | 1.863E+04        | 0.98           |
| IP       | 2.809E+06 | 2.414E+05 | -2.883E+04 | 1.273E+04 | 1.721E+04        | 0.98           |
| B[ghi]P  | 3.219E+06 | 2.961E+05 | -3.404E+04 | 1.561E+04 | 2.110E+04        | 0.98           |
